# Supplementary material for: Sensory Evaluation, Physico-Chemical Properties, and Aromatic Profile of Pasteurised Orange Juice with Resistant Maltodextrin
Source: MDPI journal article supplement (doi:10.3390/foods12214025), 2023-11-03
Supplement: s1 [file s1]

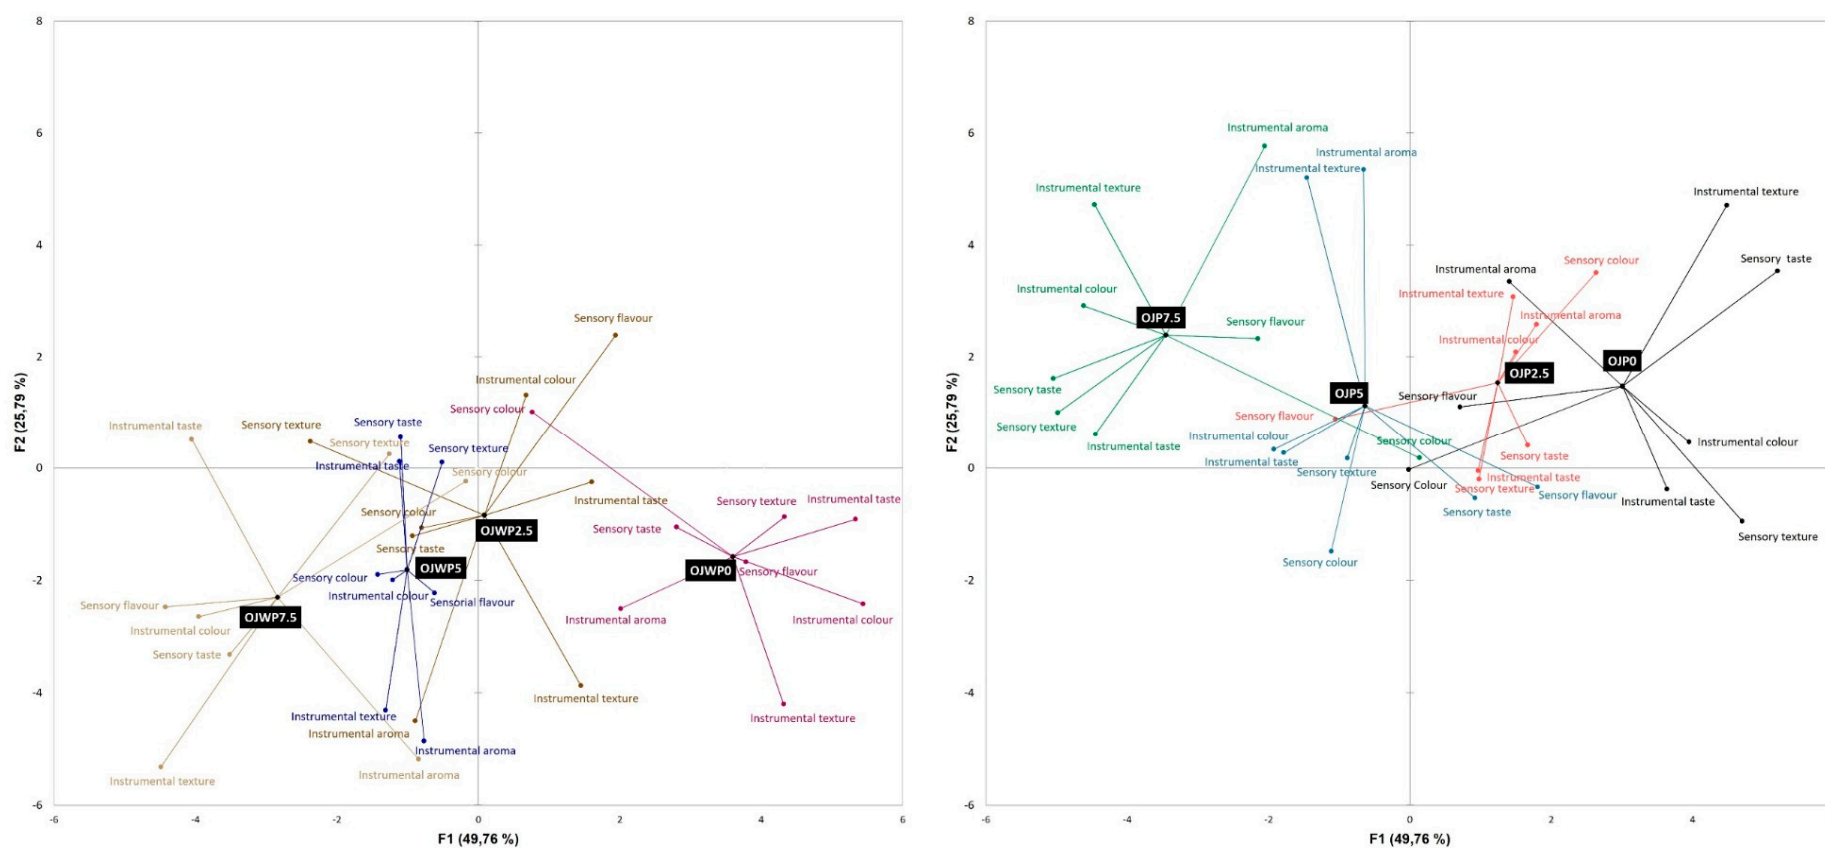

**Figure S1:** Superimposed MFA representation of the juices. Each sample is represented by eight points grouping sensory and instrumental variables studied in the samples. Each juice representation considers the eight variables simultaneously.
